# Supplementary material for: Deletions of recessive disease genes: CNV contribution to carrier states and disease-causing alleles
Source: HighWire-hosted journal article supplement (doi:10.1101/gr.156075.113), 2013-05-16
Supplement: Table_S4_-_Genomic_regions.xlsx [file Table_S4_-_Genomic_regions.xlsx]

## Sheet: Sheet1
Boone et al. Supplemental Table S4. Genomic regions containing two or more recessive disease genes and no dominant or "rec/dom" disease genes.
Genes on opposite sides of a centromere were considered to be loci in trans.
Chromosome	Start of first rec gene in region	End of last rec gene in region	Size (bp)
chr1	955502	6052533	5097031
chr1	6526151	8045342	1519191
chr1	18957499	20988037	2030538
chr1	22963117	25895377	2932260
chr1	26758772	27124894	366122
chr1	38000049	40759856	2759807
chr1	43198763	43232755	33992
chr1	45794913	46685977	891064
chr1	47715810	52870143	5154333
chr1	55315299	55474465	159166
chr1	57320442	70905534	13585092
chr1	94458393	100715409	6257016
chr1	109419602	110613322	1193720
chr1	115572414	115880857	308443
chr1	116242625	120286849	4044224
chr1	150480486	151319769	839283
chr1	156024517	156109880	85363
chr1	159997461	160040051	42590
chr1	161169104	161193418	24314
chr1	162602227	169455208	6852981
chr1	183155173	186283688	3128515
chr1	197008320	198726605	1718285
chr1	210111518	220445843	10334325
chr1	230838271	231413719	575448
chr1	235530727	236648008	1117281
chr2	1417232	9695917	8278685
chr2	25383721	31806040	6422319
chr2	44039610	44547962	508352
chr2	58386377	69664760	11278383
chr2	71162998	74375039	3212041
chr2	84650646	86094793	1444147
chr2	87011727	89050453	2038726
chr2	97426638	110962639	13536001
chr2	113816214	114036498	220284
chr2	127805598	136634047	8828449
chr2	150426147	152591001	2164854
chr2	166604312	166810348	206036
chr2	169779448	173371181	3591733
chr2	179296140	179326110	29970
chr2	202484906	202645895	160989
chr2	211342405	216214496	4872091
chr2	219524378	219680016	155638
chr2	228549925	233390425	4840500
chr2	234216308	234681945	465637
chr2	239756672	242708231	2951559
chr3	3191316	4508966	1317650
chr3	13860081	15687325	1827244
chr3	33038099	33189265	151166
chr3	43407817	43764217	356400
chr3	45959390	46752413	793023
chr3	49158546	49573051	414505
chr3	50337320	52329272	1991952
chr3	57994126	58196730	202604
chr3	100941389	121741127	20799738
chr3	124449212	126236616	1787404
chr3	128598332	128781253	182921
chr3	133464976	136049013	2584037
chr3	139062860	151102544	12039684
chr3	158362316	165555253	7192937
chr3	180331795	180707562	375767
chr3	182733005	183967313	1234308
chr3	189674516	190129932	455416
chr4	619362	998317	378955
chr4	17488015	39479271	21991256
chr4	56212387	72437804	16225417
chr4	77079891	87374283	10294392
chr4	100485239	108956331	8471092
chr4	121615928	146581187	24965259
chr4	155665162	170533778	14868616
chr4	187112673	187210835	98162
chr5	7869216	13944589	6075373
chr5	16473146	35879705	19406559
chr5	40909598	42721980	1812382
chr5	68710938	74017113	5306175
chr5	77298149	79950800	2652651
chr5	118788137	125931082	7142945
chr5	131705400	133968533	2263133
chr5	140024947	140071312	46365
chr5	149237518	149366963	129445
chr5	156607906	156901730	293824
chr5	176829138	178772431	1943293
chr6	18120717	24537435	6416718
chr6	31826828	32821748	994920
chr6	33271409	41130922	7859513
chr6	42928499	44281063	1352564
chr6	46672052	49604587	2932535
chr6	51480144	57087078	5606934
chr6	64429875	70507049	6077174
chr6	74072399	74363737	291338
chr6	80816343	88222057	7405714
chr6	101846860	107982513	6135653
chr6	108362612	112390887	4028275
chr6	116596021	117253326	657305
chr6	129204285	131905472	2701187
chr6	135605109	137540567	1935458
chr6	145946439	150725765	4779326
chr6	158589378	169068674	10479296
chr7	2557496	4834026	2276530
chr7	21582832	23053770	1470938
chr7	27132613	27142394	9781
chr7	31003635	33102409	2098774
chr7	33169151	40174251	7005100
chr7	65425672	66460588	1034916
chr7	74188308	75616173	1427865
chr7	80231503	81399452	1167949
chr7	92116336	92747336	631000
chr7	95749531	100239173	4489642
chr7	100849257	107561643	6712386
chr7	119913721	121784344	1870623
chr7	130033611	137803050	7769439
chr7	138391038	139720125	1329087
chr7	143013218	148118088	5104870
chr8	17913924	19824770	1910846
chr8	22877647	23564111	686464
chr8	27632057	38008600	10376543
chr8	57870487	61193954	3323467
chr8	63972047	68658620	4686573
chr8	77892493	96281462	18388969
chr8	97238903	100222015	2983112
chr8	104310660	105479277	1168617
chr8	133879204	143823829	9944625
chr8	145106166	145743210	637044
chr9	2621792	12710266	10088474
chr9	32972603	34661898	1689295
chr9	35073834	35658015	584181
chr9	71650478	71870124	219646
chr9	77337410	80945009	3607599
chr9	97365420	98079991	714571
chr9	98997588	100618997	1621409
chr9	102861501	104198062	1336561
chr9	108320410	119463579	11143169
chr9	130628758	131304580	675822
chr9	133320093	133968446	648353
chr9	136218665	136524466	305801
chr9	139088095	139334256	246161
chr9	139567594	140131006	563412
chr10	13319795	17171816	3852021
chr10	26223001	27035726	812725
chr10	30598729	30750762	152033
chr10	48381486	50873150	2491664
chr10	70748476	71333210	584734
chr10	72357103	75012451	2655348
chr10	75936246	76792380	856134
chr10	95753745	96612671	858926
chr10	96796528	98031333	1234805
chr10	100175954	101841642	1665688
chr10	124320181	127511837	3191656
chr11	790474	1785222	994748
chr11	2185158	2418649	233491
chr11	2920951	4114440	1193489
chr11	6411643	10315754	3904111
chr11	17515441	18429765	914324
chr11	34937676	36619829	1682153
chr11	47236492	47290584	54092
chr11	47430045	47606115	176070
chr11	59596745	61166335	1569590
chr11	63974151	64528187	554036
chr11	65306029	66301084	995055
chr11	66615996	67229245	613249
chr11	67351065	67818366	467301
chr11	68522087	76926286	8404199
chr11	94150468	102668966	8518498
chr11	102980159	108018891	5038732
chr11	110066285	111935002	1868717
chr11	117857105	118901616	1044511
chr11	121163576	124751370	3587794
chr11	128707914	134135746	5427832
chr12	7079943	7364079	284136
chr12	15475190	21757781	6282591
chr12	31226778	32798984	1572206
chr12	41086243	48298814	7212571
chr12	48513012	49365641	852629
chr12	50497601	50514234	16633
chr12	53290970	56101686	2810716
chr12	56391042	56479401	88359
chr12	58156116	65153226	6997110
chr12	76738265	81073968	4335703
chr12	91444270	95397489	3953219
chr12	102139274	103311381	1172107
chr12	108956293	110035071	1078778
chr12	123717843	132428406	8710563
chr13	23755059	25497027	1741968
chr13	29233140	31906411	2673271
chr13	33590570	36944317	3353747
chr13	39261172	48575462	9314290
chr13	51483813	52603780	1119967
chr13	103498190	108870716	5372526
chr13	111367358	113803843	2436485
chr14	20937537	23588820	2651283
chr14	39501122	50778947	11277825
chr14	66974124	70499083	3524959
chr14	74111577	75476294	1364717
chr14	76452095	77923983	1471888
chr14	81421868	91884188	10462320
chr14	96001322	97347951	1346629
chr14	106109389	106322321	212932
chr15	28000022	34635362	6635340
chr15	40453209	40765357	312148
chr15	42651697	43029417	377720
chr15	43235097	48596275	5361178
chr15	49030134	55562592	6532458
chr15	64448013	65282251	834238
chr15	72635777	73030817	395040
chr15	75182409	76603810	1421401
chr15	80445232	85349663	4904431
chr15	89787193	90198682	411489
chr15	90319588	91565833	1246245
chr15	100511642	101792137	1280495
chr16	2325878	2555734	229856
chr16	3631183	3767598	136415
chr16	4382224	8943194	4560970
chr16	14014013	15820208	1806195
chr16	28488599	28950668	462069
chr16	30759619	31000473	240854
chr16	46723557	47735434	1011877
chr16	53633817	55540586	1906769
chr16	56518258	56949762	431504
chr16	57481336	58055527	574191
chr16	70514471	77469011	6954540
chr16	83932729	86548070	2615341
chr16	87863628	88923374	1059746
chr16	89574804	89883065	308261
chr17	1646130	3566397	1920267
chr17	4854383	6338519	1484136
chr17	7589388	8151413	562025
chr17	17921333	18083116	161783
chr17	26721660	26865175	143515
chr17	39910858	39979469	68611
chr17	40554466	40729849	175383
chr17	41052814	42153712	1100898
chr17	44841686	46026674	1184988
chr17	56270088	56296966	26878
chr17	56769962	57184266	414304
chr17	63005406	63223821	218415
chr17	72912175	73975515	1063340
chr17	76108998	78194199	2085201
chr17	79617488	79894968	277480
chr18	20513294	28622781	8109487
chr18	44056934	47721451	3664517
chr18	55313658	57364644	2050986
chr18	71920526	77514510	5593984
chr19	852290	863610	11320
chr19	1383882	3928080	2544198
chr19	7587495	8675588	1088093
chr19	15619335	16008884	389549
chr19	17935592	18717660	782068
chr19	30189792	33360683	3170891
chr19	33877854	34893318	1015464
chr19	35773409	36149686	376277
chr19	36316273	38783254	2466981
chr19	39405903	39999121	593218
chr19	41099071	41930910	831839
chr19	45312338	45873845	561507
chr19	46913585	47261832	348247
chr19	50321535	50432799	111264
chr19	51409607	51858096	448489
chr19	54694118	55660606	966488
chr20	740723	982907	242184
chr20	3208062	3904502	696440
chr20	6055492	10412570	4357078
chr20	17474549	19983103	2508554
chr20	31350190	33543601	2193411
chr20	43248162	47653230	4405068
chr21	37832919	44496040	6663121
chr21	45193545	46933634	1740089
chr21	47556175	47865682	309507
chr22	18560685	18614498	53813
chr22	21213291	23922495	2709204
chr22	24891250	25603324	712074
chr22	31003069	32894818	1891749
chr22	33669061	35790207	2121146
chr22	37257029	38172563	915534
chr22	38507501	41328823	2821322
chr22	41865128	43045405	1180277
chr22	46731297	51066601	4335304
chrX	2852672	10588674	7736002
chrX	21857655	22012955	155300
chrX	23801274	30327495	6526221
chrX	31137344	38280703	7143359
chrX	46696346	47074527	378181
chrX	47431299	47489704	58405
chrX	48542185	53254604	4712419
chrX	69353317	70362304	1008987
chrX	70586113	71934029	1347916
chrX	77166193	84634748	7468555
chrX	100600643	106894256	6293613
chrX	118708498	118986991	278493
chrX	119658445	129272015	9613570
chrX	133507341	133634698	127357
chrX	135730335	136654259	923924
chrX	147582138	149841616	2259478
chrX	152953751	153200607	246856
chrX	153607596	153650063	42467
chrX	153991030	154493852	502822
